# Supplementary material
Source: HighWire-hosted journal article supplement (https://bmjopen.bmj.com/content/13/3/e063198)
Supplement: inline-supplementary-material-1 [file inline-supplementary-material-1.pdf]

**Supplementary****Table S1. List of individual TNFi**

| Individual TNFi  | Dataset source   |                 |                      |
|------------------|------------------|-----------------|----------------------|
|                  | Total<br>(N=825) | OBRI<br>(N=417) | RHUMADATA<br>(N=408) |
| Etanercept (%)   | 283 (34.3)       | 138 (33.1)      | 145 (35.5)           |
| Adalimumab (%)   | 181 (21.9)       | 116 (25.8)      | 65 (15.9)            |
| Golimumab (%)    | 158 (19.2)       | 72 (17.3)       | 86 (21.1)            |
| Certozulimab (%) | 131 (15.9)       | 65 (15.6)       | 66 (16.2)            |
| Infliximab (%)   | 53 (6.4)         | 7 (6.5)         | 46 (11.3)            |

TNFi: tumor necrosis factor inhibitor

**Figure S1. Distribution of propensity scores across treatment groups within deciles**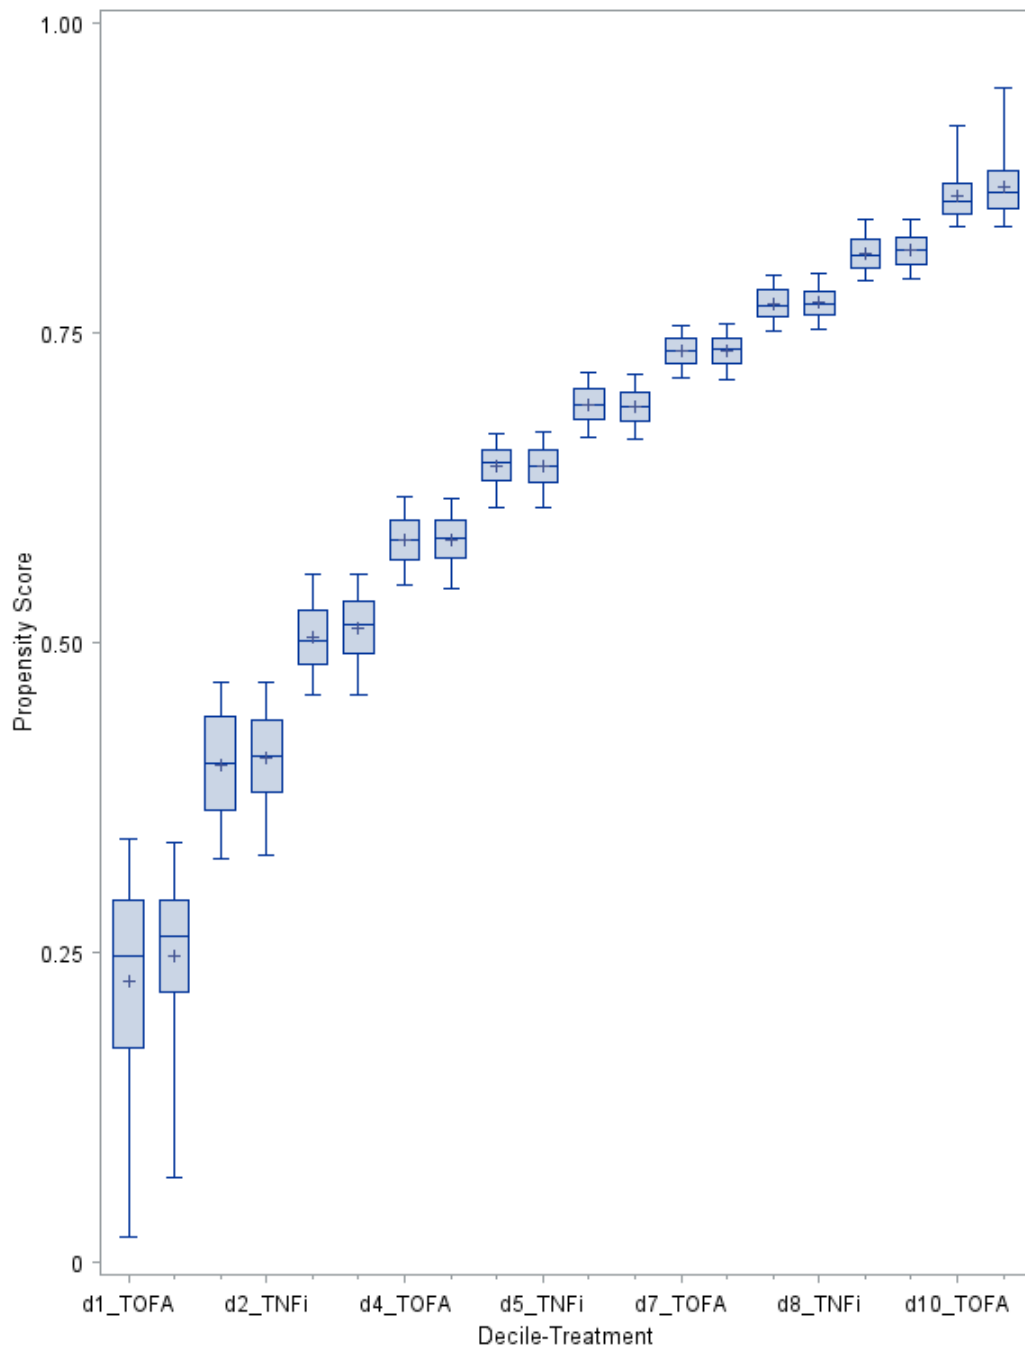

TNFi: tumor necrosis factor inhibitor; TOFA: tofacitinib

**Table S2. Discontinuation of TNFi vs. TOFA by Reason for Discontinuation in first line users: Univariable and Multivariable Cox Regression Models**

| Reason                        | TNFi vs. TOFA    |                                 |                        |                                 |                                                       |                               |                  |                               |
|-------------------------------|------------------|---------------------------------|------------------------|---------------------------------|-------------------------------------------------------|-------------------------------|------------------|-------------------------------|
|                               | Unadjusted       |                                 | Complete data analysis |                                 | Multiple Imputed Data                                 |                               |                  |                               |
|                               | N=708            |                                 | N=393                  |                                 | Propensity score stratification (PS deciles)<br>N=708 |                               | SIPTW<br>N=708   |                               |
|                               | Number of events | HRs (95% CI), p-value           | Number of events       | HRs (95% CI), p-value           | Number of events                                      | HRs (95% CI), p-value         | Number of events | HRs (95% CI), p-value         |
| <b>Due to any reason</b>      | 237              | 1.02 (0.74-1.41), 0.91          | 117                    | 0.88 (0.56-1.39), 0.57          | 237                                                   | 1.01 (0.72-1.40), 0.99        | 237              | 1.10 (0.78-1.55), 0.56        |
| <b>Due to ineffectiveness</b> | 114              | 1.64 (0.96-12.84), 0.07         | 49                     | 2.21 (0.89-5.52), 0.08          | 114                                                   | 1.52 (0.86-2.67), 0.15        | 114              | 1.64 (0.95-2.86), 0.08        |
| <b>Due to adverse events</b>  | 46               | <b>0.34 (0.19-0.60), 0.0003</b> | 26                     | <b>0.21 (0.09-0.48), 0.0002</b> | 46                                                    | <b>0.42 (0.23-0.78), 0.01</b> | 46               | <b>0.44 (0.24-0.81), 0.01</b> |

Covariates with more than 10% standardized difference between the two treatment groups were used to calculate propensity score: Age, gender, RF status, ACPA status, disease duration, smoking status, pain, fatigue, diabetes, cancer, ESR, CRP, concomitant use of LEF, HCQ, and SSZ

TNFi: tumor necrosis factor inhibitor; TOFA: tofacitinib; PS: propensity score; SIPTW: stabilized inverse probability of treatment weight; RF: rheumatoid factor; ACPA: anti-circulated protein antibody; ESR: erythrocyte sedimentation rate; CRP: C-reactive protein; LEF: leflunomide; HCQ: hydroxychloroquine; SSZ: sulfasalazine.
